# Supplementary material for: Serum fibrinogen levels and the CRP-to-fibrinogen ratio as predictors of short-term mortality in acute ischemic stroke with active cancer
Source: Research Square preprint supplement (doi:10.21203/rs.3.rs-7232240/v1), 2025-09-29
Supplement: Supplementary file 1 [file d25ad30eea6a52abcfb6fe8e.xlsx]

## Sheet: SFL CFR
No.	Age (years)	Male sex	Hypertension	Diabetes mellitus	Dyslipidemia	History of stroke	History of coronary artery disease	Smoking	Heavy drinking	mRS score before stroke onset	Time from stroke onset to admission	In-hospital onset	Neurologically asymptomatic	Intravanious thrombolysis	Mechanical thrombectomy	Stroke etiology	Primary active canser	Histology of the primary active cancer	Systemic metastasis	Canser diagnosis during hospitalization	Pre-admission treatment	Multiple vascular territories	White blood cell count	Hematoclit	Platelet	D-dimer	SFLs	CRP	CFR	Stroke treatment	45-day mortality	90-day mortality	180-day mortality	Cause of death within 180 days after admission	Onset	Admission	Death	Survival time from admission (days)
1	44	1	0	0	0	0	0	1	1	3	1	0	0	0	0	Cryptogenic	Breast	Unknown	1	0	Anticancer drugs	0	4.3	0.239	155	2.6	8.55	99	11.5789	Unfractionated heparin	0	0	1	Unknown	20051219	20051220	20060418	119
2	55	1	1	0	1	0	0	0	0	2	1	0	0	0	0	Cryptogenic	Colorectal	Unknown	1	1		1	28.6	0.275	139	34.2	1.17	116	99.1453	None	1	1	1	Unknown	20060209	20060210	20060212	2
3	70	0	0	0	0	0	1	0	0	2	1	0	0	1	0	Cryptogenic	Others	Unknown	0	0	Anticoagulants, Antiplatelet agents	0	5.6	0.31	218	18.4	2.56	1	0.390625	Unfractionated heparin	0	0	0		2.00609e+07	20060915		>180
4	79	0	0	0	0	1	0	1	0	1	0	0	0	0	0	Cryptogenic	Lung	Unknown	1	0		1	8.7	0.396	188	8	3.76	6	1.59574	Unfractionated heparin	0	1	1	Unknown	2.00804e+07	20080418	20080620	63
5	78	0	1	0	0	0	0	1	0	1	1	0	0	0	0	Cryptogenic	Biliary	Unknown	1	1	Antiplatelet agents	1	4.4	0.315	150	23.3	1.18	4	3.38983	Unfractionated heparin	0	1	1	Primary cancer	2.00906e+07	20090602	20090801	60
6	60	0	0	1	1	0	0	0	0	0	5	0	0	0	0	Cryptogenic	Gastric	Adenocarcinoma	0	0	Anticancer drugs	0	6.2	0.396	202	0.1	2.4	0.01	0.00416667	Antiplatelet agents	0	0	0		2.00906e+07	20090617		>180
7	72	0	1	0	0	0	0	1	1	3	1	1	0	0	0	Cryptogenic	Lung	Adenocarcinoma	1	0	Anticancer drugs	1	4	0.347	63	9.2	2.34	8	3.4188	None	1	1	1	Unknown	20110606	20110607	20110609	2
8	67	0	0	0	0	0	0	0	0	4	1	0	0	0	0	Cryptogenic	Others	Others	1	0		1	12	0.254	104	4.1	3.61	69	19.1136	Antiplatelet agents	0	1	1	Primary cancer	2.01202e+07	20120220	20120406	46
9	34	0	0	0	0	0	0	1	0	0	3	0	0	0	0	Cryptogenic	Kidney	Others	1	0	Anticancer drugs	1	6.9	0.266	276	18.9	4.12	109	26.4563	None	1	1	1	Thrombosis	2.01209e+07	20120905	20120922	17
10	66	0	0	0	0	0	0	0	0	3	0	0	0	0	0	Cryptogenic	Bladder	Adenocarcinoma	1	0	Anticancer drugs	1	8.5	0.397	128	22.5	1.55	21	13.5484	Unfractionated heparin	1	1	1	Primary cancer	2.01309e+07	20130927	20131102	36
11	74	0	0	0	0	0	0	0	0	2	1	0	0	0	0	Cryptogenic	Lung	Squamous cell	0	0	Radiation	0	13.6	0.495	147	1.8	8.11	139	17.1393	Unfractionated heparin	0	1	1	Primary cancer	2.01312e+07	20131206	20140121	46
12	78	0	1	1	1	0	0	1	0	0	0	0	0	0	0	With large-artery atherosclerosis	Pacreas	Adenocarcinoma	0	0	Anticancer drugs	0	9	0.322	490	2.7	3.08	2	0.649351	Antiplatelet agents	0	0	0		2.01403e+07	2.01403e+07		>180
13	58	0	1	1	0	0	0	1	1	1	1	0	0	0	1	Cryptogenic	Lung	Squamous cell	1	0	Antiplatelet agents	0	5.9	0.402	72	9.7	1.56	6	3.84615	None	1	1	1	Thrombosis	2.01405e+07	20140516	20140530	14
14	78	1	1	1	1	0	1	0	0	3	0	1	0	0	0	Cryptogenic	Gastric	Unknown	1	1	Anticoagulants, Antiplatelet agents	1	12.8	0.337	57	23.8	1.5	57	38	None	1	1	1	Hemorrhage	2.01405e+07	20140521	20140523	2
15	69	1	1	0	1	0	0	1	1	2	1	0	0	0	0	Cryptogenic	Pacreas	Adenocarcinoma	0	0	Anticancer drugs	0	3.6	0.275	206	1.9	2.72	5	1.83824	Unfractionated heparin	0	0	0		2.01406e+07	20140630		>180
16	62	1	0	0	0	0	0	0	0	1	4	0	0	0	0	Cryptogenic	Biliary	Adenocarcinoma	1	0	Anticancer drugs	0	4	0.232	71	8	2.46	8	3.25203	Unfractionated heparin	0	1	1	Primary cancer	20140707	20140711	20140901	52
17	61	0	0	1	0	0	0	0	1	1	3	0	0	0	0	Cryptogenic	Others	Unknown	0	0	Anticancer drugs	1	5.4	0.406	65	16.1	2.28	46	20.1754	Unfractionated heparin	1	1	1	Thrombosis	2.01409e+07	20140924	20181012	18
18	80	0	0	0	0	1	0	1	0	2	0	0	0	0	0	With cardioembolism	Colorectal	Unknown	0	0	Anticancer drugs, Antiplatelet agents	0	7.5	0.302	293	3	5.59	43	7.69231	Unfractionated heparin	1	1	1	Primary cancer	2.01501e+07	20150109	20150120	11
19	77	0	1	0	0	0	0	1	0	0	0	0	0	0	0	Cryptogenic	Lung	Adenocarcinoma	0	0		1	13	0.461	133	21.3	1.01	2	1.9802	Unfractionated heparin	0	0	1	Unknown	2.01503e+07	20150320	20150830	163
20	54	1	1	0	0	0	0	0	0	1	1	0	0	0	0	Cryptogenic	Lung	Adenocarcinoma	1	0	Anticancer drugs, Radiation	1	13.4	0.421	313	49.9	4.05	60	14.8148	None	1	1	1	Primary cancer	20150420	20150421	20150504	13
21	69	1	1	0	0	0	0	0	0	2	2	0	0	0	0	Cryptogenic	Gynecologic	Adenocarcinoma	0	0	Anticancer drugs	1	9.6	0.339	157	14.8	3.21	72	22.4299	Unfractionated heparin	0	1	1	Primary cancer	2.01507e+07	20150710	20150910	62
22	73	0	0	1	1	0	0	1	0	2	0	0	0	0	0	Cryptogenic	Lung	Squamous cell	0	0	Anticoagulants, Anticancer drugs	1	4.9	0.335	299	2	7.37	130	17.6391	Unfractionated heparin	0	0	1	Primary cancer	2.01509e+07	2.01509e+07	20151218	95
23	64	1	0	0	0	0	0	0	0	3	0	1	0	0	0	Cryptogenic	Colorectal	Adenocarcinoma	1	0	Anticoagulants, Anticancer drugs	1	6.8	0.329	95	123.2	1.87	39	20.8556	Unfractionated heparin	1	1	1	Primary cancer	2.01603e+07	20160306	20160316	10
24	56	1	0	0	1	0	0	0	0	2	0	0	0	0	0	Cryptogenic	Pacreas	Adenocarcinoma	1	0	Anticancer drugs	1	7.9	0.247	49	16.4	1.45	16	11.0345	Antiplatelet agents	1	1	1	Hemorrhage	20160501	20160501	20160503	2
25	72	0	1	0	1	0	1	1	0	0	1	1	0	0	0	With small-vessel disease	Bladder	Unknown	0	0		0	7.5	0.387	201	0.8	3.76	6	1.59574	Antiplatelet agents	0	0	0		20160521	20160522		>180
26	58	0	1	1	0	0	0	1	0	2	2	0	0	0	0	Cryptogenic	Lung	Adenocarcinoma	1	0		1	71.5	0.444	172	1.2	3.56	39	10.9551	Unfractionated heparin	0	1	1	Primary cancer	20160712	20160714	20160908	56
27	63	1	0	0	0	0	0	1	0	3	0	0	0	0	0	Cryptogenic	Gastric	Adenocarcinoma	1	0	Anticancer drugs	1	8.9	0.397	139	26.7	3.48	9	2.58621	Unfractionated heparin	1	1	1	Primary cancer	2.01608e+07	20160813	20180911	29
28	74	1	0	1	0	0	0	0	0	3	0	1	0	0	0	Cryptogenic	Pacreas	Unknown	1	1		1	14.9	0.419	73	15.9	1.52	32	21.0526	Unfractionated heparin	1	1	1	Primary cancer	20161201	20161201	20161222	21
29	67	0	0	0	0	0	0	1	1	0	0	0	1	0	0	Cryptogenic	Lung	Adenocarcinoma	0	0	Anticancer drugs, Radiation	1	5.5	0.288	169	6.5	4.79	35.1	7.32777	Unfractionated heparin	0	1	1	Primary cancer	20170302	20170302	20170527	86
30	70	0	1	1	0	0	0	1	1	2	1	0	0	0	0	Cryptogenic	Bladder	Others	1	0	Anticoagulants	1	7.1	0.347	162	4.6	5.18	119.2	23.0116	Unfractionated heparin	0	1	1	Primary cancer	2.01711e+07	20171109	20180102	54
31	83	1	0	0	0	0	0	0	0	1	3	1	0	0	0	Cryptogenic	Biliary	Unknown	1	0	Anticancer drugs	1	5.2	0.247	161	58.9	2.21	45.3	20.4977	Unfractionated heparin	1	1	1	Unknown	2.01711e+07	20171127	20180103	37
32	48	0	0	0	0	0	0	1	0	1	5	0	0	0	0	Cryptogenic	Lung	Adenocarcinoma	1	0		1	8	0.458	155	25.3	1.08	3.9	3.61111	Unfractionated heparin	1	1	1	Primary cancer	20180205	20180210	20180307	25
33	68	0	1	0	0	0	0	0	0	1	1	1	0	0	0	Cryptogenic	Biliary	Adenocarcinoma	1	0	Anticancer drugs	1	5.8	0.248	252	7.3	6.68	194.5	29.1168	Unfractionated heparin	0	0	1	Primary cancer	20180519	20180520	20180924	127
34	77	0	0	0	0	0	0	1	0	4	1	1	0	0	0	Cryptogenic	Bladder	Others	0	0		1	19.8	0.408	251	2.3	4.46	11	2.46637	Antiplatelet agents	0	0	0		20180606	20180607		>180
35	77	0	1	1	1	0	1	1	0	2	3	1	0	0	0	Cryptogenic	Lung	Adenocarcinoma	1	0	Radiation, Antiplatelet agents	1	7	0.402	115	3.5	4.42	11.8	2.66968	Unfractionated heparin	0	0	0		20180619	20180622		>180
36	72	0	1	0	1	0	0	1	0	4	0	0	0	0	0	Cryptogenic	Lung	Adenocarcinoma	1	0	Anticancer drugs	1	8.3	0.392	171	16.2	5.6	69.4	12.3929	Unfractionated heparin	0	0	0		2.01806e+07	2.01806e+07		>180
37	73	1	1	0	0	0	0	1	0	3	0	0	1	0	0	Cryptogenic	Lung	Adenocarcinoma	0	0		1	5.2	0.248	279	10.8	6.68	107.6	16.1078	Unfractionated heparin	0	0	0		2.01806e+07	2.01806e+07		>180
38	64	1	1	0	0	0	0	0	0	2	0	0	0	0	0	Cryptogenic	Lung	Adenocarcinoma	1	0	Anticancer drugs	0	5.4	0.368	96	11.9	2.4	3.6	1.5	Unfractionated heparin	0	0	0		20180713	20180713		>180
39	65	1	1	0	0	0	0	0	0	0	1	1	0	0	0	Cryptogenic	Gynecologic	Others	1	0	Anticoagulants, Anticancer drugs	1	15.1	0.286	259	3.9	3.8	149.8	39.4211	None	1	1	1	Unknown	2.01807e+07	20180717	20180725	8
40	78	0	0	0	0	0	0	1	0	0	0	0	0	1	1	Cryptogenic	Lung	Adenocarcinoma	1	0		1	5.9	0.339	393	50.4	5.97	108.6	18.191	Unfractionated heparin	0	0	0		2.01807e+07	2.01807e+07		>180
41	74	0	0	0	0	0	0	1	0	0	0	0	0	0	0	Cryptogenic	Kidney	Unknown	0	0		0	8.5	0.352	389	1.3	6.89	28.8	4.17997	Unfractionated heparin	0	0	0		2.01807e+07	2.01807e+07		>180
42	68	0	0	0	0	0	0	0	0	2	0	1	0	0	0	Cryptogenic	Bladder	Others	1	0	Anticoagulants, Anticancer drugs	1	8.2	0.27	316	2.9	3.37	6.5	1.92878	Unfractionated heparin	1	1	1	Unknown	2.01807e+07	20180731	20180822	22
43	74	0	1	1	0	0	0	1	1	2	0	0	0	0	0	Cryptogenic	Others	Unknown	1	0		1	17.6	0.4	110	12.2	1.45	23.7	16.3448	Unfractionated heparin	1	1	1	Unknown	2.01808e+07	2.01808e+07	20180913	37
44	86	1	1	1	1	0	0	0	0	3	0	0	0	0	0	Cryptogenic	Gastric	Adenocarcinoma	1	0		1	11	0.357	152	3	2.51	42.3	16.8526	Unfractionated heparin	1	1	1	Primary cancer	2.0181e+07	20181012	20181028	16
45	77	1	0	0	0	0	0	0	0	1	0	0	0	0	0	Cryptogenic	Biliary	Adenocarcinoma	1	0	Anticancer drugs	1	6	0.26	183	35.4	1.95	49.9	25.5897	Antiplatelet agents	1	1	1	Primary cancer	2.01812e+07	20181201	20181226	25
46	79	0	1	0	1	0	0	1	1	0	1	0	0	0	0	Cryptogenic	Pacreas	Adenocarcinoma	1	0	Anticancer drugs	0	8.1	0.198	70	8.7	2.42	32.2	13.3058	Unfractionated heparin	0	1	1	Primary cancer	20190301	20190302	20190510	69
47	68	0	0	1	1	0	0	1	0	3	0	1	0	0	0	Cryptogenic	Pacreas	Adenocarcinoma	1	0	Anticoagulants, Anticancer drugs	1	11.9	0.273	443	45.1	8.04	116.2	14.4527	Unfractionated heparin	1	1	1	Primary cancer	2.01904e+07	20190420	20240527	37
48	85	0	1	0	0	1	0	0	0	1	1	1	0	0	0	With cardioembolism	Lung	Unknown	1	0	Anticoagulants	1	6.8	0.271	210	8.9	3.02	13.7	4.53642	Unfractionated heparin	1	1	1	Primary cancer	20190602	20190603	20190711	38
49	68	1	0	0	0	0	0	0	0	0	0	0	0	0	0	Cryptogenic	Breast	Unknown	1	1		0	8.9	0.327	232	5.7	3.1	33.4	10.7742	None	0	0	1	Primary cancer	2.01907e+07	2.01907e+07	20200101	175
50	80	0	0	0	0	1	0	1	0	3	3	0	0	0	0	Cryptogenic	Gastric	Adenocarcinoma	1	0		1	4.4	0.36	110	0.8	2.78	0.7	0.251799	Unfractionated heparin	0	0	0		2.01911e+07	20191114		>180
51	69	0	0	1	0	0	0	0	0	0	1	1	0	0	0	Cryptogenic	Gastric	Adenocarcinoma	1	0		1	7.3	0.274	241	22.1	2.23	0.4	0.179372	Unfractionated heparin	0	0	0		2.02001e+07	20200114		>180
52	79	1	0	0	0	0	0	0	0	0	2	1	0	0	0	Cryptogenic	Pacreas	Adenocarcinoma	1	0	Anticancer drugs	1	21	0.298	75	55.9	2.73	122.8	44.9817	None	1	1	1	Primary cancer	20200407	20200409	20200517	38
53	75	0	0	0	1	1	0	1	0	3	2	0	1	0	0	With cardioembolism	Lung	Squamous cell	0	0		1	8	0.417	268	2.1	5.7	40.4	7.08772	Unfractionated heparin	0	1	1	Primary cancer	20200527	20200529	20200721	53
54	65	0	0	0	0	0	0	1	0	0	0	0	0	0	0	Cryptogenic	Gastric	Adenocarcinoma	1	0	Anticancer drugs	1	6.7	0.313	297	2.8	5.6	15.3	2.73214	Unfractionated heparin	0	0	0		2.02006e+07	2.02006e+07		>180
55	79	0	1	1	0	0	0	1	0	3	0	0	0	0	0	With cardioembolism	Kidney	Unknown	1	0	Antiplatelet agents	1	18	0.297	119	12.1	4.06	190.2	46.8473	Unfractionated heparin	1	1	1	Primary cancer	20200613	20200613	20200620	7
56	71	1	0	0	0	0	0	0	0	3	0	1	0	0	0	Cryptogenic	Pacreas	Unknown	1	0		1	9.9	0.218	156	26.8	1.5	24.8	16.5333	Unfractionated heparin	1	1	1	Primary cancer	2.0201e+07	20201002	20201024	22
57	72	0	1	1	0	0	0	1	0	3	0	0	0	1	0	Cryptogenic	Gastric	Adenocarcinoma	1	0	Anticancer drugs	1	31.4	0.261	429	44.9	3.81	235.6	61.8373	Unfractionated heparin	1	1	1	Primary cancer	2.0201e+07	20201015	20201031	16
58	82	1	1	1	0	0	0	0	0	2	0	1	0	0	0	Cryptogenic	Pacreas	Adenocarcinoma	0	0	Anticancer drugs, Radiation	1	5.6	0.318	184	20	3.47	36.8	10.6052	Unfractionated heparin	0	0	1	Unknown	2.02104e+07	2.02104e+07	20210802	121
59	84	1	1	0	0	0	0	0	0	0	0	0	0	0	0	Cryptogenic	Lung	Adenocarcinoma	1	0	Anticancer drugs	1	3.4	0.287	222	3.9	5.19	22.4	4.31599	Unfractionated heparin	0	0	1	Primary cancer	20210527	20210527	20211027	153
60	72	1	1	1	1	0	1	1	0	2	1	0	0	0	1	Cryptogenic	Lung	Adenocarcinoma	1	0	Anticoagulants, Anticancer drugs, Antiplatelet agents	1	14.1	0.321	142	32.6	2.81	27.4	9.75089	None	1	1	1	Hemorrhage	2.02108e+07	20210822	20210827	5
61	78	1	1	0	1	0	0	1	0	0	0	0	0	0	1	With cardioembolism	Gynecologic	Others	0	0	Anticoagulants	1	9.6	0.366	194	6.2	1.9	1.2	0.631579	DOAC	0	0	0		20210913	20210913		>180
62	74	1	1	0	1	0	0	0	0	2	0	0	0	0	0	Cryptogenic	Gastric	Unknown	1	0	Anticancer drugs	1	4.5	0.391	202	6.5	3	0.5	0.166667	Unfractionated heparin	0	1	1	Primary cancer	2.0211e+07	2.0211e+07	20220101	89
63	70	0	0	1	1	1	0	1	0	4	0	0	0	0	0	Cryptogenic	Pacreas	Unknown	1	0	Anticoagulants, Anticancer drugs	1	9.8	0.297	169	8.2	4.65	18.7	4.02151	Unfractionated heparin	1	1	1	Primary cancer	2.0211e+07	2.0211e+07	20211120	45
64	75	0	1	0	1	0	0	1	0	0	1	0	0	1	1	Cryptogenic	Colorectal	Adenocarcinoma	1	0	Anticancer drugs	0	8	0.345	141	2.5	5.72	5.1	0.891608	Unfractionated heparin	0	0	1	Primary cancer	2.0211e+07	20211025	20220221	119
65	54	0	1	1	0	0	0	1	0	0	2	0	0	0	0	Cryptogenic	Lung	Others	1	0	Anticancer drugs, Radiation	1	7.9	0.226	139	0.8	5.26	12.1	2.30038	Unfractionated heparin	0	0	1	Unknown	20211106	20211108	20220325	137
66	44	1	0	0	0	0	0	0	0	1	0	0	0	1	1	Cryptogenic	Breast	Adenocarcinoma	1	0	Anticancer drugs	1	2.8	0.226	170	1.9	2.72	0.3	0.110294	None	0	0	0		2.02112e+07	2.02112e+07		>180
67	72	1	0	0	0	0	0	0	0	0	1	0	0	0	0	Cryptogenic	Gynecologic	Others	0	0		1	6	0.299	160	28.6	2.15	77.1	35.8605	Unfractionated heparin	0	0	1	Unknown	20220413	20220414	20220813	121
68	88	1	1	1	0	0	0	0	0	3	0	0	0	0	0	Cryptogenic	Biliary	Unknown	1	0		1	17.3	0.271	48	21	1.76	33.4	18.9773	None	1	1	1	Primary cancer	20220501	20220501	20220527	26
69	72	0	1	1	1	0	0	1	1	0	0	0	0	0	1	With cardioembolism	Lung	Adenocarcinoma	0	1	Anticoagulants	1	11.9	0.331	99	17.7	3.32	158.1	47.6205	Unfractionated heparin	1	1	1	Primary cancer	20220825	20220825	20221002	38
70	62	0	1	1	0	0	0	1	0	0	0	1	0	0	0	Cryptogenic	Pacreas	Unknown	1	0	Anticancer drugs	0	11.7	0.254	208	3.1	3.11	18.4	5.9164	Unfractionated heparin	0	0	0		2.02209e+07	2.02209e+07		>180
71	75	0	0	0	0	0	0	1	0	0	0	0	0	0	0	Cryptogenic	Lung	Unknown	1	0	Anticancer drugs, Radiation	1	16	0.4	209	3.4	5.88	31	5.27211	Unfractionated heparin	1	1	1	Primary cancer	2.02301e+07	20230124	20230207	14
72	85	1	1	0	0	0	0	0	0	2	0	0	0	0	0	Cryptogenic	Colorectal	Unknown	1	0		1	13.3	0.337	161	5.4	2.63	7.2	2.73764	Unfractionated heparin	0	0	1	Unknown	2.02301e+07	2.02301e+07	20230601	124
73	81	1	1	0	1	0	0	0	0	0	0	0	0	0	1	Cryptogenic	Breast	Unknown	1	0	Anticancer drugs	1	6.5	0.345	156	59.4	2.2	48.7	22.1364	Unfractionated heparin	1	1	1	Primary cancer	2.02303e+07	20230309	20230405	27
74	92	1	1	0	1	0	0	1	0	0	2	0	0	0	0	Cryptogenic	Lung	Adenocarcinoma	1	0	Anticoagulants	1	12.1	0.335	31	35	1.79	51.3	28.6592	Unfractionated heparin	1	1	1	Unknown	2.02304e+07	20230405	20230507	32
75	76	0	1	0	0	0	0	1	0	0	0	0	0	0	0	Cryptogenic	Pacreas	Adenocarcinoma	1	0		1	5.9	0.294	171	17.6	2.21	30	13.5747	Unfractionated heparin	1	1	1	Hemorrhage	2.02304e+07	20230425	20230531	36
76	77	1	1	0	0	0	0	1	0	1	0	0	0	0	0	Cryptogenic	Lung	Squamous cell	1	0	Anticancer drugs	1	11	0.27	403	1.9	2.52	7.4	2.93651	Unfractionated heparin	0	1	1	Unknown	2.02308e+07	2.02308e+07	20231010	54
77	83	1	1	0	0	0	0	0	0	4	0	1	0	1	1	With cardioembolism	Others	Unknown	1	0		0	14.6	0.309	364	1.9	3.24	88.5	27.3148	DOAC	0	1	1	Unknown	2.02403e+07	2.02403e+07	20240429	47
78	75	0	0	0	0	0	0	1	0	0	0	0	0	0	1	Cryptogenic	Bladder	Others	0	0		1	16.7	0.275	74	22.6	1.45	26.7	18.4138	Unfractionated heparin	1	1	1	Primary cancer	2.02404e+07	2.02404e+07	20240512	41
79	62	1	0	0	0	1	0	0	0	3	2	0	0	0	0	Cryptogenic	Lung	Others	1	0	Anticancer drugs	1	4.4	0.367	102	8.3	1.41	2.5	1.77305	Unfractionated heparin	0	0	0		20240706	20240708		>180
80	70	0	0	0	0	0	0	1	0	4	0	1	0	0	0	Cryptogenic	Lung	Squamous cell	1	0		1	11.3	0.103	197	42.5	0.5	38.9	77.8	None	1	1	1	Primary cancer	20240713	20240713	20240723	10
81	65	0	0	0	0	0	0	1	0	2	0	0	0	0	0	Cryptogenic	Lung	Squamous cell	1	0	Anticancer drugs	0	14.9	0.289	254	10.4	6.69	172.2	25.7399	Unfractionated heparin	0	0	0		20240730	20240730		>180
82	56	0	0	0	0	0	0	1	0	3	0	1	0	0	1	Cryptogenic	Lung	Adenocarcinoma	1	0	Anticancer drugs	1	8.9	0.322	142	9.5	3.17	25.3	7.98107	Unfractionated heparin	0	1	1	Primary cancer	20240912	20240912	20241121	70
83	64	0	1	0	0	0	0	1	0	0	0	1	0	0	1	With large-artery atherosclerosis	Others	Squamous cell	0	0	Anticancer drugs, Radiation	0	5.6	0.385	195	1.5	2.91	0.1	0.0343643	Antiplatelet agents	0	0	0		20240923	20240923		>180
84	62	0	1	1	1	0	0	0	0	3	0	0	0	0	0	Cryptogenic	Pacreas	Unknown	1	0	Anticoagulants, Anticancer drugs	1	3.5	0.349	50	6.3	2.22	19.1	8.6036	None	0	1	1	Hemorrhage	20240924	20240924	20241126	63
85	62	1	1	1	1	0	0	1	0	0	1	0	0	0	0	With large-artery atherosclerosis	Gynecologic	Unknown	1	0	Anticancer drugs	0	7.5	0.45	304	0.9	5.05	4	0.792079	Antiplatelet agents	0	0	0		2.02409e+07	20240926		>180
86	82	0	0	1	0	0	0	1	0	3	0	1	0	0	1	Cryptogenic	Gastric	Adenocarcinoma	0	0		0	9.3	0.358	190	4	3.4	133.1	39.1471	Unfractionated heparin	0	0	0		20240926	20240926		>180
87	76	1	1	0	1	1	0	0	0	2	0	0	0	0	1	With cardioembolism	Lung	Unknown	1	0	Anticancer drugs, Radiation	0	6.5	0.423	267	0.6	4.16	0.5	0.120192	None	0	0	0		2.02409e+07	20240926		>180
88	76	1	1	0	0	0	0	0	0	4	0	0	0	0	0	Cryptogenic	Gynecologic	Unknown	1	0	Anticancer drugs	1	13.2	0.212	289	6.1	4.67	101	21.6274	Unfractionated heparin	1	1	1	Primary cancer	20241105	20241105	20241206	31
89	55	0	1	1	0	0	0	1	0	1	0	1	0	0	1	With cardioembolism	Pacreas	Adenocarcinoma	1	0	Anticoagulants, Anticancer drugs	1	8.4	0.429	254	3.7	1.43	3	2.0979	None	1	1	1	Primary cancer	20241105	20241105	20241125	20
90	67	1	0	1	0	1	0	0	0	0	1	0	0	0	1	With cardioembolism	Gynecologic	Unknown	0	1	Anticoagulants	0	9.9	0.347	201	3.5	2.36	0.5	0.211864	DOAC	0	0	0		20241118	20241119		>180
91	63	1	1	0	0	0	0	0	0	0	0	0	0	0	0	Cryptogenic	Pacreas	Adenocarcinoma	1	0	Anticoagulants, Anticancer drugs, Radiation	1	6.1	0.279	223	3.5	4.67	37.5	8.02998	Unfractionated heparin	0	1	1	Unknown	20250105	20250105	20250221	47
92	52	1	1	0	0	0	0	0	0	2	1	1	0	0	0	Cryptogenic	Colorectal	Others	1	0		0	6	0.271	90	40.6	4.04	58.7	14.5297	Unfractionated heparin	0	1	1	Primary cancer	20250128	20250128	20250421	83
